# Supplementary material
Source: publisher site journal article supplement (https://static.cambridge.org/content/id/urn:cambridge.org:id:article:S1537592721003091/resource/name/S1537592721003091supp001.pdf)
Supplement: Supplementary file 1 [file S1537592721003091supp001.pdf]

Online Appendix for COVID-19 and Asian Americans: How Elite Messaging and Social Exclusion Shape Partisan Attitudes (Perspectives on Politics)

**Appendix A: Twitter Data**

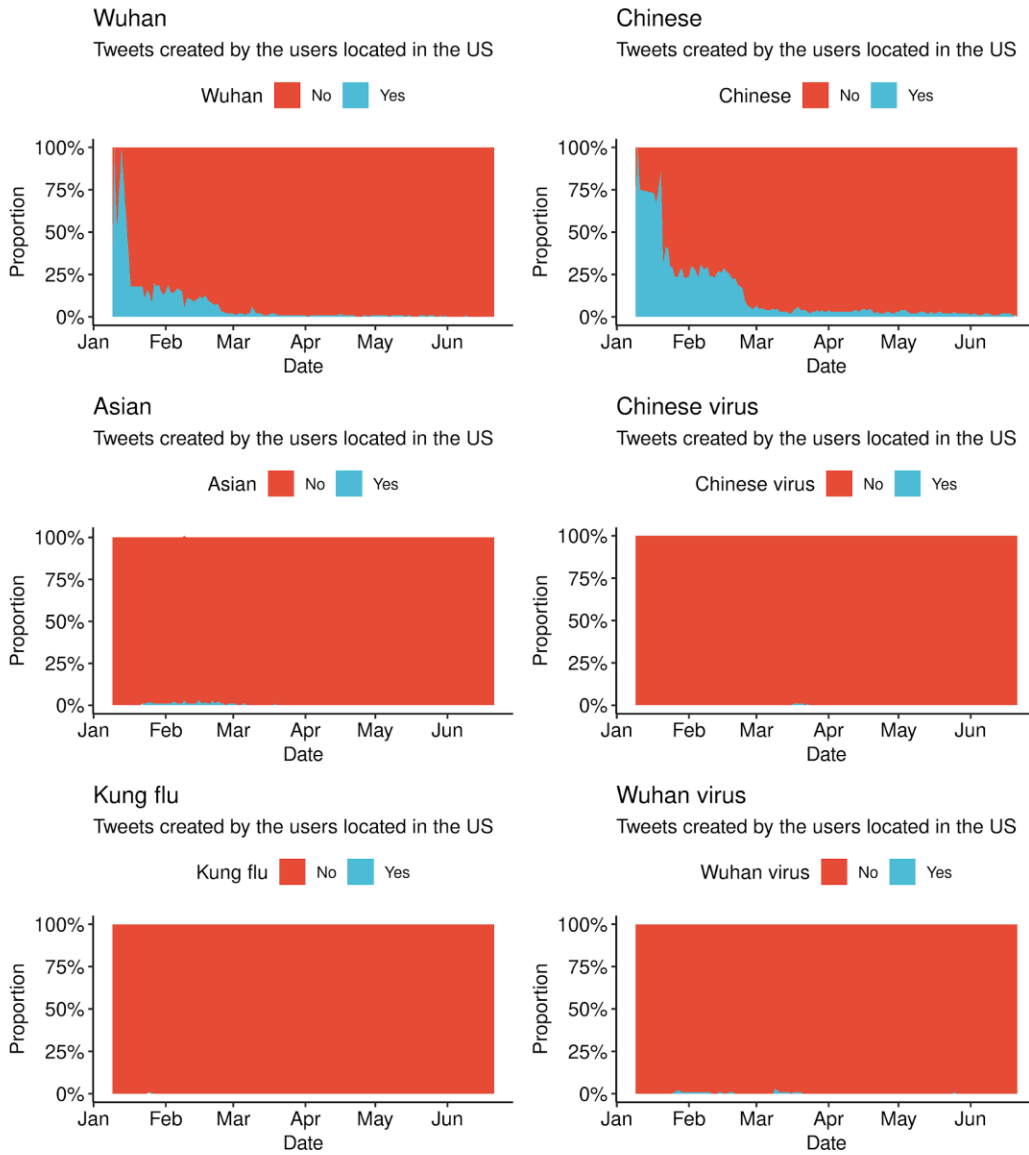

**Figure A.1: Broader Twitter trends in stacked line plots**

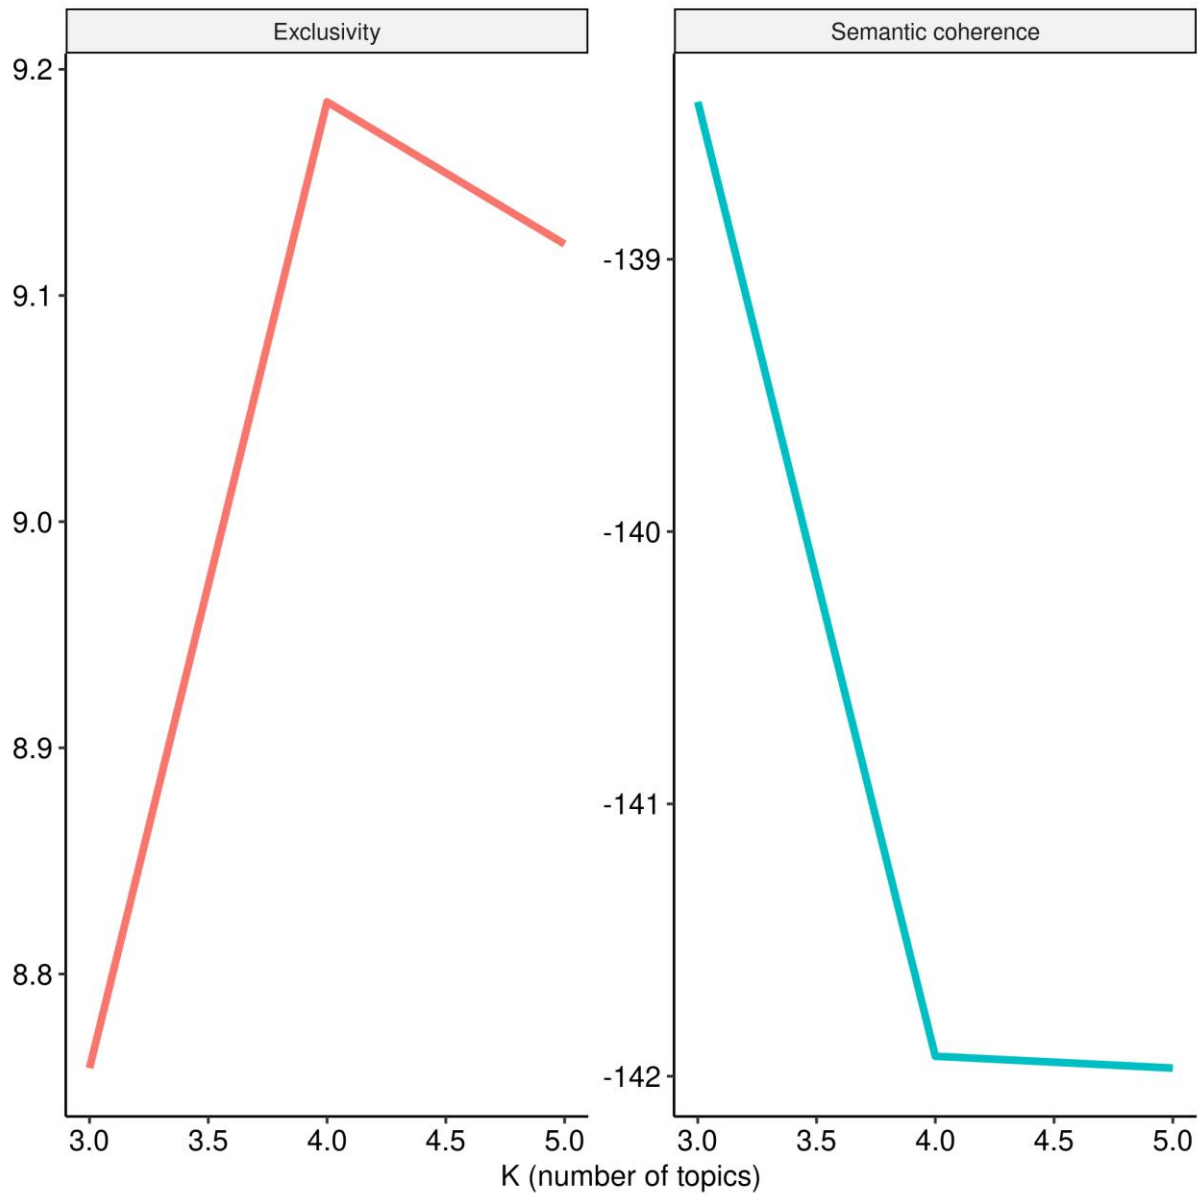

**Figure A.2: Topic modeling diagnostics**

### Topic-document distributions

Tweets mentioned COVID-19 and either Asian, Chinese, or Wuhan related word:

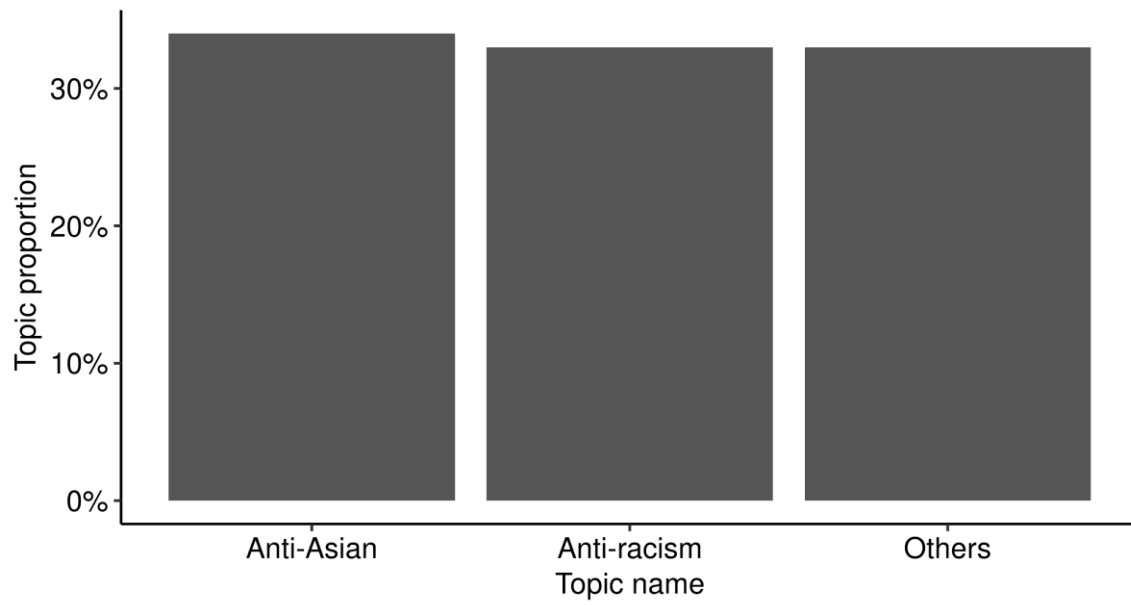

**Figure A.3: Base topic modeling analysis results**

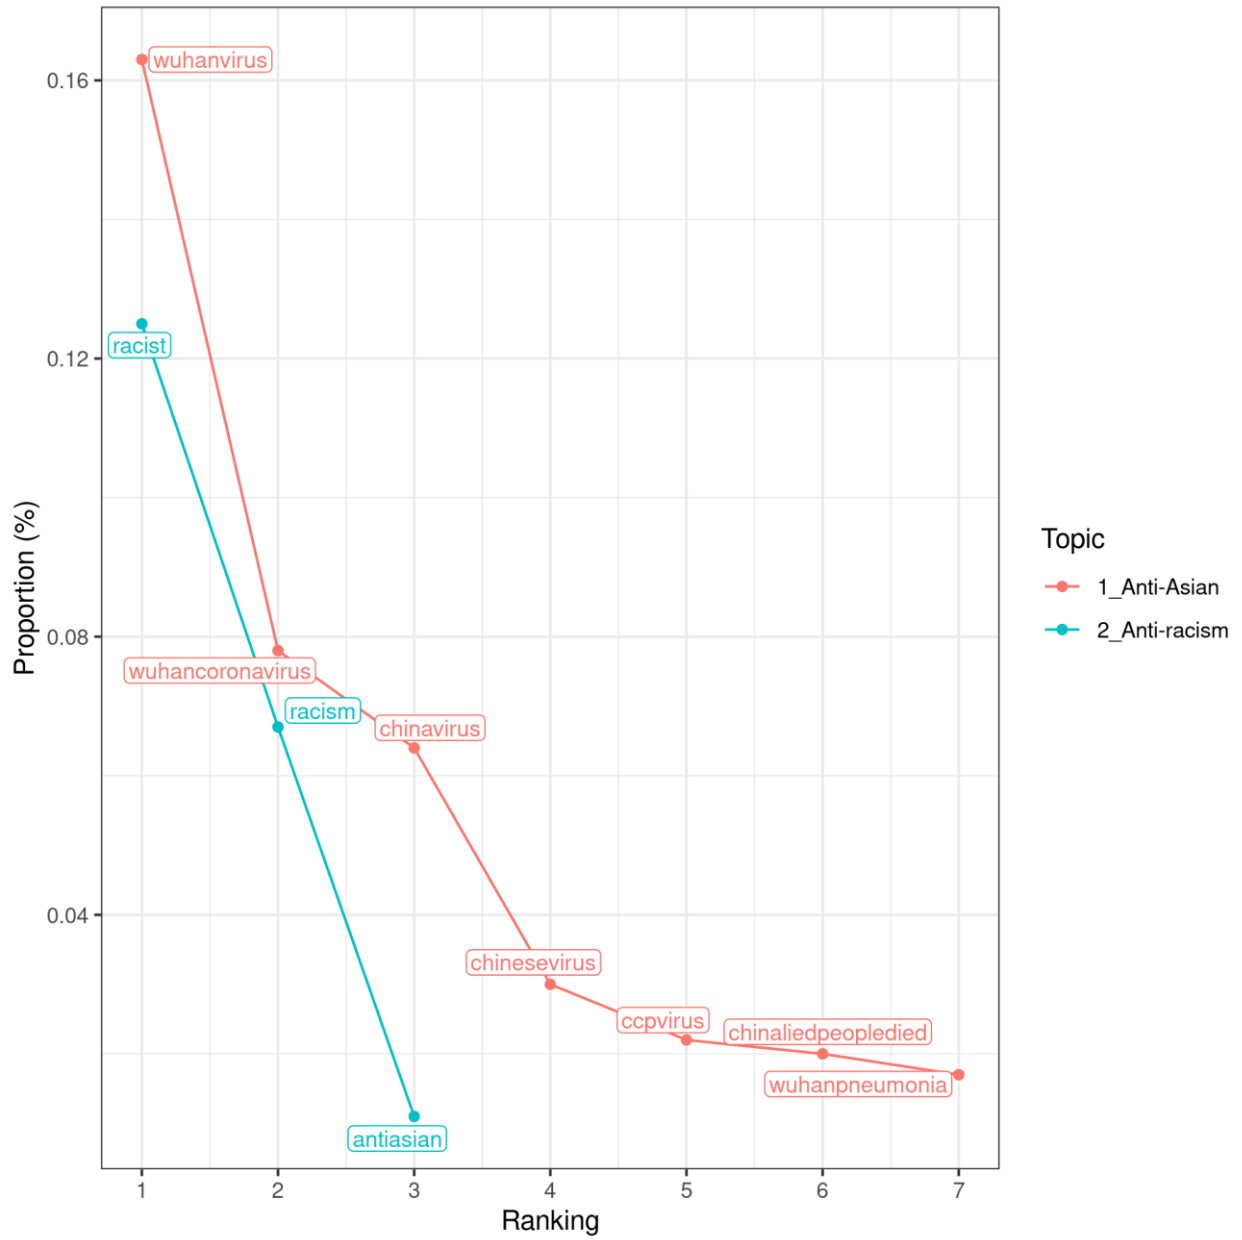

**Figure A.4: Topic word distribution**

## Appendix B: Survey Data

|                             | <i>Dependent variable:</i>  |                         |                                    |                         |
|-----------------------------|-----------------------------|-------------------------|------------------------------------|-------------------------|
|                             | <i>OLS</i><br>Dem Party Fav | <i>OLS</i><br>Biden Fav | <i>logistic</i><br>Dem Party<br>ID | <i>OLS</i><br>Dem Index |
| “Chinese Virus”             | 0.056**<br>(0.026)          | 0.050*<br>(0.026)       | 0.218<br>(0.154)                   | 0.049**<br>(0.023)      |
| Female                      | 0.017***<br>(0.006)         | 0.012**<br>(0.006)      | 0.259***<br>(0.034)                | 0.028***<br>(0.005)     |
| Income                      | -0.034***<br>(0.010)        | -0.026**<br>(0.010)     | 0.358***<br>(0.062)                | 0.003<br>(0.009)        |
| Education                   | 0.036**<br>(0.015)          | 0.067***<br>(0.015)     | 0.258***<br>(0.089)                | 0.050***<br>(0.013)     |
| Age                         | -0.001***<br>(0.0002)       | 0.001***<br>(0.0002)    | 0.004***<br>(0.001)                | 0.0002<br>(0.0002)      |
| Born Outside of The<br>U.S. | 0.0002<br>(0.007)           | 0.001<br>(0.007)        | -0.469***<br>(0.038)               | -0.032***<br>(0.006)    |
| Protestant                  | -0.075***<br>(0.010)        | -0.095***<br>(0.010)    | -0.261***<br>(0.059)               | -0.073***<br>(0.009)    |
| Liberal                     | 0.189***<br>(0.007)         | 0.115***<br>(0.007)     | 1.514***<br>(0.038)                | 0.218***<br>(0.006)     |
| Constant                    | 0.580***<br>(0.021)         | 0.438***<br>(0.021)     | -1.381***<br>(0.126)               | 0.406***<br>(0.019)     |
| Weekly Fixed Effects        | Yes                         | Yes                     | Yes                                | Yes                     |
| Observations                | 11,685                      | 11,685                  | 11,803                             | 11,613                  |
| R <sup>2</sup>              | 0.088                       | 0.048                   |                                    | 0.130                   |
| Adjusted R <sup>2</sup>     | 0.084                       | 0.044                   |                                    | 0.126                   |

|                     |                            |                            |                            |
|---------------------|----------------------------|----------------------------|----------------------------|
| Log Likelihood      |                            |                            | -9,917.484                 |
| Akaike Inf. Crit.   |                            |                            | 19,932.970                 |
| Residual Std. Error | 0.374 (df = 11636)         | 0.373 (df = 11636)         | 0.331 (df = 11564)         |
| F Statistic         | 23.372*** (df = 48; 11636) | 12.096*** (df = 48; 11636) | 35.887*** (df = 48; 11564) |

*Note:* OLS or logistic regression coefficients with standard errors in parentheses. \*\*\*p<0.01, \*\*p<0.05, \*p<0.01.

**Table B.1: Chinese Virus and Partisan Attitudes (Asian Americans Only)**

|                          | <i>Dependent variable:</i>    |                      |                       |                        |
|--------------------------|-------------------------------|----------------------|-----------------------|------------------------|
|                          | Democratic Party Favorability |                      |                       |                        |
|                          | Asian American                | African American     | Latina/o              | White                  |
| “Chinese Virus”          | 0.056**<br>(0.026)            | -0.012<br>(0.016)    | -0.003<br>(0.016)     | 0.019***<br>(0.007)    |
| Female                   | 0.017***<br>(0.006)           | 0.067***<br>(0.004)  | 0.040***<br>(0.004)   | 0.049***<br>(0.002)    |
| Income                   | -0.034***<br>(0.010)          | 0.026***<br>(0.006)  | -0.026***<br>(0.007)  | -0.055***<br>(0.003)   |
| Education                | 0.036**<br>(0.015)            | 0.032***<br>(0.010)  | 0.072***<br>(0.010)   | 0.118***<br>(0.004)    |
| Age                      | -0.001***<br>(0.0002)         | 0.001***<br>(0.0001) | -0.002***<br>(0.0001) | -0.002***<br>(0.00005) |
| Born Outside of The U.S. | 0.0002<br>(0.007)             | 0.009*<br>(0.005)    | 0.025***<br>(0.004)   | 0.031***<br>(0.002)    |
| Protestant               | -0.075***<br>(0.010)          | 0.028***<br>(0.005)  | -0.112***<br>(0.007)  | -0.079***<br>(0.002)   |
| Liberal                  | 0.189***<br>(0.007)           | 0.108***<br>(0.004)  | 0.190***<br>(0.004)   | 0.340***<br>(0.002)    |

|                         |                            |                            |                            |                              |
|-------------------------|----------------------------|----------------------------|----------------------------|------------------------------|
| Constant                | 0.580***<br>(0.021)        | 0.564***<br>(0.013)        | 0.595***<br>(0.013)        | 0.455***<br>(0.006)          |
| Weekly Fixed Effects    | Yes                        | Yes                        | Yes                        | Yes                          |
| Observations            | 11,685                     | 30,366                     | 35,812                     | 188,218                      |
| R <sup>2</sup>          | 0.088                      | 0.051                      | 0.083                      | 0.194                        |
| Adjusted R <sup>2</sup> | 0.084                      | 0.049                      | 0.081                      | 0.194                        |
| Residual Std. Error     | 0.374 (df = 11636)         | 0.312 (df = 30317)         | 0.356 (df = 35763)         | 0.337 (df = 188169)          |
| F Statistic             | 23.372*** (df = 48; 11636) | 33.809*** (df = 48; 30317) | 67.162*** (df = 48; 35763) | 946.469*** (df = 48; 188169) |

Note: OLS regression coefficients with standard errors in parentheses. \*\*\*p<0.01, \*\*p<0.05, \*p<0.01.

**Table B.2: Democratic Party Favorability Across Racial/Ethnic Groups**

|                          | <i>Dependent variable:</i> |                      |                      |                         |
|--------------------------|----------------------------|----------------------|----------------------|-------------------------|
|                          | J. Biden Favorability      |                      |                      |                         |
|                          | Asian American             | African American     | Latina/o             | White                   |
| “Chinese Virus”          | 0.050*<br>(0.026)          | 0.030*<br>(0.016)    | -0.017<br>(0.016)    | -0.038***<br>(0.007)    |
| Female                   | 0.012**<br>(0.006)         | 0.044***<br>(0.004)  | 0.036***<br>(0.004)  | 0.043***<br>(0.002)     |
| Income                   | -0.026**<br>(0.010)        | 0.018***<br>(0.006)  | -0.020***<br>(0.007) | -0.043***<br>(0.003)    |
| Education                | 0.067***<br>(0.015)        | 0.059***<br>(0.010)  | 0.080***<br>(0.010)  | 0.138***<br>(0.004)     |
| Age                      | 0.001***<br>(0.0002)       | 0.003***<br>(0.0001) | -0.00000<br>(0.0001) | -0.0001***<br>(0.00005) |
| Born Outside of The U.S. | 0.001<br>(0.007)           | 0.019***<br>(0.005)  | 0.024***<br>(0.004)  | 0.021***<br>(0.002)     |
| Protestant               | -0.095***                  | 0.042***             | -0.068***            | -0.074***               |

|                         |                               |                               |                               |                                 |
|-------------------------|-------------------------------|-------------------------------|-------------------------------|---------------------------------|
|                         | (0.010)                       | (0.005)                       | (0.007)                       | (0.002)                         |
| Liberal                 | 0.115***<br>(0.007)           | 0.060***<br>(0.004)           | 0.098***<br>(0.004)           | 0.235***<br>(0.002)             |
| Constant                | 0.438***<br>(0.021)           | 0.467***<br>(0.013)           | 0.518***<br>(0.013)           | 0.387***<br>(0.006)             |
| Weekly Fixed Effects    | Yes                           | Yes                           | Yes                           | Yes                             |
| Observations            | 11,685                        | 30,501                        | 35,917                        | 188,683                         |
| R <sup>2</sup>          | 0.048                         | 0.059                         | 0.030                         | 0.106                           |
| Adjusted R <sup>2</sup> | 0.044                         | 0.058                         | 0.029                         | 0.106                           |
| Residual Std. Error     | 0.373 (df =<br>11636)         | 0.304 (df =<br>30452)         | 0.353 (df =<br>35868)         | 0.341 (df = 188634)             |
| F Statistic             | 12.096*** (df =<br>48; 11636) | 40.104*** (df =<br>48; 30452) | 23.264*** (df =<br>48; 35868) | 465.648*** (df = 48;<br>188634) |

*Note:* Logistic regression coefficients with standard errors in parentheses. \*\*\*p<0.01, \*\*p<0.05, \*p<0.01.

**Table B.3: Biden Favorability Across Racial/Ethnic Groups**

| <i>Dependent variable:</i> |                                 |                     |                      |                      |
|----------------------------|---------------------------------|---------------------|----------------------|----------------------|
|                            | Democratic Party Identification |                     |                      |                      |
|                            | Asian American                  | African American    | Latina/o             | White                |
| “Chinese Virus”            | 0.218<br>(0.154)                | 0.010<br>(0.117)    | -0.375***<br>(0.096) | 0.036<br>(0.052)     |
| Female                     | 0.259***<br>(0.034)             | 0.521***<br>(0.026) | 0.187***<br>(0.022)  | 0.413***<br>(0.012)  |
| Income                     | 0.358***<br>(0.062)             | 0.440***<br>(0.044) | -0.093**<br>(0.040)  | -0.158***<br>(0.021) |
| Education                  | 0.258***<br>(0.089)             | -0.015<br>(0.072)   | 0.427***<br>(0.059)  | 0.353***<br>(0.030)  |
| Age                        | 0.004***<br>(0.001)             | 0.026***<br>(0.001) | 0.007***<br>(0.001)  | 0.007***<br>(0.0003) |



|                          |                      |                      |                      |                      |
|--------------------------|----------------------|----------------------|----------------------|----------------------|
| Born Outside of The U.S. | -0.469***<br>(0.038) | -0.479***<br>(0.035) | -0.044*<br>(0.024)   | 0.100***<br>(0.018)  |
| Protestant               | -0.261***<br>(0.059) | 0.365***<br>(0.038)  | -0.237***<br>(0.043) | -0.296***<br>(0.015) |
| Liberal                  | 1.514***             | 1.243***             | 1.413***             | 2.253***             |
| Constant                 | -1.381***<br>(0.126) | -1.422***<br>(0.094) | -1.046***<br>(0.075) | -2.158***<br>(0.043) |

|                      |            |             |             |             |
|----------------------|------------|-------------|-------------|-------------|
| Weekly Fixed Effects | Yes        | Yes         | Yes         | Yes         |
| Observations         | 11,803     | 30,847      | 36,314      | 189,784     |
| Log Likelihood       | -9,917.484 | -16,733.960 | -24,522.920 | -89,132.850 |
| Akaike Inf. Crit.    | 19,932.970 | 33,565.930  | 49,143.830  | 178,363.700 |

*Note:* Logistic regression coefficients with standard errors in parentheses. \*\*\*p<0.01, \*\*p<0.05, \*p<0.01.

**Table B.4: Democratic Party Identification Across Racial/Ethnic Groups**

|                 | Dependent variable:    |                      |                      |                         |
|-----------------|------------------------|----------------------|----------------------|-------------------------|
|                 | Democratic Party Index |                      |                      |                         |
|                 | Asian American         | African American     | Latina/o             | White                   |
| “Chinese Virus” | 0.049**<br>(0.023)     | 0.007<br>(0.014)     | -0.030**<br>(0.014)  | -0.004<br>(0.006)       |
| Female          | 0.028***<br>(0.005)    | 0.074***<br>(0.003)  | 0.039***<br>(0.003)  | 0.053***<br>(0.001)     |
| Income          | 0.003<br>(0.009)       | 0.045***<br>(0.005)  | -0.021***<br>(0.006) | -0.041***<br>(0.002)    |
| Education       | 0.050***<br>(0.013)    | 0.028***<br>(0.009)  | 0.083***<br>(0.009)  | 0.104***<br>(0.003)     |
| Age             | 0.0002<br>(0.0002)     | 0.003***<br>(0.0001) | -0.00005<br>(0.0001) | -0.0003***<br>(0.00004) |

|                          |                      |                      |                      |                      |
|--------------------------|----------------------|----------------------|----------------------|----------------------|
| Born Outside of The U.S. | -0.032***<br>(0.006) | -0.026***<br>(0.005) | 0.015***<br>(0.004)  | 0.024***<br>(0.002)  |
| Protestant               | -0.073***<br>(0.009) | 0.045***<br>(0.004)  | -0.079***<br>(0.006) | -0.067***<br>(0.002) |
| Liberal                  | 0.218***<br>(0.006)  | 0.137***<br>(0.003)  | 0.209***<br>(0.004)  | 0.355***<br>(0.002)  |
| Constant                 | 0.406***<br>(0.019)  | 0.416***<br>(0.012)  | 0.456***<br>(0.011)  | 0.307***<br>(0.005)  |

|                         |                            |                            |                            |                                |
|-------------------------|----------------------------|----------------------------|----------------------------|--------------------------------|
| Weekly Fixed Effects    | Yes                        | Ye                         | Yes                        | Yes                            |
| Observations            | 11,613                     | 30,143                     | 35,566                     | 187,452                        |
| R <sup>2</sup>          | 0.130                      | 0.129                      | 0.106                      | 0.250                          |
| Adjusted R <sup>2</sup> | 0.126                      | 0.128                      | 0.105                      | 0.250                          |
| Residual Std. Error     | 0.331 (df = 11564)         | 0.271 (df = 30094)         | 0.310 (df = 35517)         | 0.284 (df = 187403)            |
| F Statistic             | 35.887*** (df = 48; 11564) | 93.087*** (df = 48; 30094) | 87.869*** (df = 48; 35517) | 1,304.819*** (df = 48; 187403) |

Note: Logistic regression coefficients with standard errors in parentheses. \*\*\*p<0.01, \*\*p<0.05, \*p<0.01.

**Table B.5: Democratic Party Leaning Across Racial/Ethnic Groups**

|                                    | <i>Dependent variable:</i> |                     |                      |
|------------------------------------|----------------------------|---------------------|----------------------|
|                                    | AAPI + Black               | AAPI + White        | AAPI + Latina/o      |
| Trump Statement on “Chinese Virus” | 0.016<br>(0.013)           | -0.0005<br>(0.006)  | -0.012<br>(0.012)    |
| Female                             | -0.136***<br>(0.004)       | 0.061***<br>(0.003) | -0.021***<br>(0.004) |
| Income                             | 0.062***<br>(0.003)        | 0.051***<br>(0.001) | 0.035***<br>(0.003)  |

|                          |                      |                         |                      |
|--------------------------|----------------------|-------------------------|----------------------|
| Education                | 0.026***<br>(0.005)  | -0.038***<br>(0.002)    | -0.011**<br>(0.005)  |
| Age                      | 0.031***<br>(0.007)  | 0.101***<br>(0.003)     | 0.067***<br>(0.007)  |
| Born Outside of The U.S. | 0.002***<br>(0.0001) | -0.0003***<br>(0.00004) | 0.00003<br>(0.0001)  |
| Protestant               | -0.036***<br>(0.003) | 0.015***<br>(0.002)     | -0.001<br>(0.003)    |
| Liberal                  | 0.015***<br>(0.004)  | -0.068***<br>(0.002)    | -0.079***<br>(0.005) |
| Chinese Virus * Asian    | 0.017**<br>(0.008)   | 0.015**<br>(0.006)      | 0.017**<br>(0.008)   |
| Constant                 | 0.461***<br>(0.010)  | 0.308***<br>(0.005)     | 0.449***<br>(0.010)  |

---

|                         |                                |                                   |                                |
|-------------------------|--------------------------------|-----------------------------------|--------------------------------|
| Weekly Fixed Effects    | Yes                            | Yes                               | Yes                            |
| Observations            | 41,756                         | 199,065                           | 45,858                         |
| R <sup>2</sup>          | 0.163                          | 0.243                             | 0.110                          |
| Adjusted R <sup>2</sup> | 0.162                          | 0.243                             | 0.109                          |
| Residual Std. Error     | 0.292 (df = 41705)             | 0.288 (df = 199014)               | 0.318 (df = 45807)             |
| F Statistic             | 161.929*** (df = 50;<br>41705) | 1,276.554*** (df = 50;<br>199014) | 113.662*** (df = 50;<br>45807) |

---

Note: OLS regression coefficients with standard errors in parentheses. \*\*\*p<0.01, \*\*p<0.05, \*p<0.01.

**Table B.7: Chinese Virus and Democratic Party Index for Asian Americans Relative to Other Racial/Ethnic Groups (Full Model)**

---

*Dependent variable:*

---

Democratic Party Index

---

|                                       |                      |
|---------------------------------------|----------------------|
| Trump Statement on<br>“Chinese Virus” | 0.039<br>(0.025)     |
| Female                                | -0.011<br>(0.012)    |
| Income                                | 0.028***<br>(0.005)  |
| Education                             | 0.015<br>(0.018)     |
| Age                                   | 0.050***<br>(0.014)  |
| Born Outside of The U.S.              | 0.0002<br>(0.0002)   |
| Protestant                            | -0.032***<br>(0.006) |
| Liberal                               | -0.074***            |
| Chinese Virus * Income                | 0.016<br>(0.014)     |
| Constant                              | 0.406***<br>(0.019)  |

---

|                         |                            |
|-------------------------|----------------------------|
| Weekly Fixed Effects    | Yes                        |
| Observations            | 11,613                     |
| R <sup>2</sup>          | 0.130                      |
| Adjusted R <sup>2</sup> | 0.126                      |
| Residual Std. Error     | 0.331 (df = 11562)         |
| F Statistic             | 34.489*** (df = 50; 11562) |

Note: OLS regression coefficients with standard errors in parentheses. \*\*\*p<0.01, \*\*p<0.05, \*p<0.01.

**Table B.8: Chinese Virus and Democratic Party Index Among Asian Americans by High and Low Income**

|                                       | <i>Dependent variable:</i> |                      |                        |                      |                      |                      |
|---------------------------------------|----------------------------|----------------------|------------------------|----------------------|----------------------|----------------------|
|                                       | Chinese                    | Indian               | Democratic Party Index |                      | Filipina/o           | Japanese             |
|                                       |                            |                      | Korean                 | Vietnamese           |                      |                      |
| Trump Statement on<br>“Chinese Virus” | 0.156***<br>(0.049)        | 0.026<br>(0.044)     | 0.117<br>(0.111)       | -0.034<br>(0.069)    | -0.078<br>(0.066)    | -0.126<br>(0.084)    |
| Female                                | 0.009<br>(0.011)           | 0.007<br>(0.010)     | 0.069***<br>(0.022)    | -0.002<br>(0.020)    | 0.052***<br>(0.015)  | 0.053***<br>(0.020)  |
| Income                                | 0.012<br>(0.020)           | 0.070***<br>(0.018)  | -0.070*<br>(0.040)     | 0.070*<br>(0.037)    | -0.110***<br>(0.026) | 0.019<br>(0.036)     |
| Education                             | -0.088***<br>(0.029)       | 0.105***<br>(0.026)  | 0.188***<br>(0.055)    | -0.002<br>(0.050)    | 0.083*<br>(0.043)    | 0.182***<br>(0.053)  |
| Age                                   | 0.001***<br>(0.0004)       | 0.0003<br>(0.0004)   | -0.002***<br>(0.001)   | -0.003***<br>(0.001) | 0.001*<br>(0.001)    | 0.001<br>(0.001)     |
| Born Outside of The<br>U.S.           | -0.055***<br>(0.012)       | -0.028**<br>(0.013)  | -0.002<br>(0.025)      | -0.024<br>(0.024)    | -0.052***<br>(0.018) | 0.005<br>(0.022)     |
| Protestant                            | -0.054***<br>(0.015)       | -0.136***<br>(0.023) | -0.025<br>(0.024)      | 0.146**<br>(0.057)   | -0.117***<br>(0.028) | -0.115***<br>(0.028) |
| Liberal                               | 0.259***<br>(0.013)        | 0.156***<br>(0.011)  | 0.207***<br>(0.025)    | 0.215***<br>(0.024)  | 0.258***<br>(0.018)  | 0.247***<br>(0.022)  |
| Constant                              | 0.364***<br>(0.045)        | 0.416***<br>(0.034)  | 0.332***<br>(0.107)    | 0.665***<br>(0.061)  | 0.473***<br>(0.054)  | 0.241***<br>(0.070)  |

|                         |                           |                           |                         |                         |                          |                         |
|-------------------------|---------------------------|---------------------------|-------------------------|-------------------------|--------------------------|-------------------------|
| Weekly Fixed Effects    | Yes                       | Yes                       | Yes                     | Yes                     | Yes                      | Yes                     |
| Observations            | 2,547                     | 2,724                     | 730                     | 644                     | 1,615                    | 940                     |
| R <sup>2</sup>          | 0.215                     | 0.155                     | 0.289                   | 0.345                   | 0.187                    | 0.293                   |
| Adjusted R <sup>2</sup> | 0.199                     | 0.140                     | 0.238                   | 0.293                   | 0.162                    | 0.254                   |
| Residual Std. Error     | 0.330 (df = 2498)         | 0.322 (df = 2675)         | 0.294 (df = 681)        | 0.263 (df = 595)        | 0.336 (df = 1566)        | 0.343 (df = 891)        |
| F Statistic             | 14.216*** (df = 48; 2498) | 10.230*** (df = 48; 2675) | 5.756*** (df = 48; 681) | 6.544*** (df = 48; 595) | 7.484*** (df = 48; 1566) | 7.678*** (df = 48; 891) |

---

*Note:* OLS regression coefficients with standard errors in parentheses. \*\*\*p<0.01, \*\*p<0.05, \*p<0.01.

**Table B.9: Chinese Virus and Democratic Party Index Among Asian Americans by National-Origin**
